# Supplementary material for: Human Disturbance Increases Health Risks to Golden Snub-Nosed Monkeys and the Transfer Risk of Pathogenic Antibiotic-Resistant Bacteria from Golden Snub-Nosed Monkeys to Humans
Source: MDPI journal article supplement (doi:10.3390/ani13193083), 2023-10-03
Supplement: s1 [file s1]

**Table S1.** Samples selected by micro-PITA for metagenomic sequencing.

| Treatments                         | Sample |      |      |      |      |      |      |      |
|------------------------------------|--------|------|------|------|------|------|------|------|
| Wild group (W group)               | W36    | W42  | W10  | W40  | W15  | W41  | W34  | W38  |
|                                    | W9     | W7   | W5   | W3   | W13  | W44  | W21  |      |
| human disturbance group (HD group) | HD1    | HD4  | HD7  | HD31 | HD17 | HD50 | HD41 | HD34 |
|                                    | HD16   | HD35 | HD33 | HD40 | HD44 | HD38 | HD47 |      |

**Table S2** Characteristics of high quality MAGs

| Bin Id    | Contigs Num | N50 (contigs) (bp) | Mean contig length (bp) | Completeness (%) | Contamination (%) | Bins converag e | Cotigs contain (%) |
|-----------|-------------|--------------------|-------------------------|------------------|-------------------|-----------------|--------------------|
| bin570    | 502         | 2139537            | 23483                   | 80.05            | 5.87              | 37              | 0.001944531        |
| bin580    | 405         | 3443               | 3256                    | 57.82            | 2.78              | 95              | 0.001568795        |
| bin134    | 96          | 1524783            | 100348                  | 62.05            | 5.8               | 147             | 0.000371862        |
| bin399    | 455         | 2823               | 2677                    | 50.4             | 0.67              | 37              | 0.001762473        |
| bin379    | 19          | 83111              | 48057                   | 50.83            | 0                 | 171             | 7.35978E-05        |
| bin641    | 295         | 2429               | 2429                    | 51.31            | 0.81              | 14              | 0.001142702        |
| bin360    | 363         | 2860               | 2794                    | 51.37            | 0.67              | 27              | 0.001406105        |
| bin671    | 432         | 2363               | 2393                    | 51.46            | 1.51              | 24              | 0.001673381        |
| bin388    | 390         | 3093               | 2852                    | 53.03            | 3.52              | 72              | 0.001510691        |
| bin333    | 52          | 42622              | 24508                   | 53.49            | 3.14              | 69              | 0.000201425        |
| bin248    | 272         | 2859               | 2701                    | 54.23            | 3.37              | 28              | 0.00105361         |
| bin43     | 19          | 115017             | 65510                   | 54.89            | 0.24              | 144             | 7.35978E-05        |
| bin400    | 351         | 3463               | 3147                    | 54.96            | 0.45              | 37              | 0.001359622        |
| bin241    | 536         | 5103               | 4086                    | 57.24            | 1.75              | 58              | 0.002076232        |
| bin239    | 341         | 3888               | 3472                    | 57.76            | 0                 | 27              | 0.001320886        |
| bin376    | 101         | 17424              | 13126                   | 57.9             | 0.67              | 171             | 0.00039123         |
| bin27     | 195         | 10300              | 7684                    | 67.01            | 0                 | 455             | 0.000755346        |
| bin32     | 209         | 4059               | 3483                    | 64.39            | 0                 | 34              | 0.000809575        |
| bin410    | 23          | 66135              | 41129                   | 61.6             | 0                 | 189             | 8.9092E-05         |
| bin12     | 68          | 17962              | 11873                   | 75.67            | 0.13              | 29              | 0.000263403        |
| bin34     | 48          | 22304              | 13578                   | 61.94            | 0.16              | 69              | 0.000185931        |
| bin2      | 51          | 63217              | 41040                   | 99.33            | 0.17              | 77              | 0.000197552        |
| bin36     | 339         | 5307               | 4464                    | 74.34            | 0.17              | 16              | 0.001313139        |
| HD bin504 | 66          | 78904              | 36822                   | 99.19            | 0.2               | 60              | 0.000255655        |
| bin291    | 52          | 48449              | 33590                   | 69.62            | 0.27              | 93              | 0.000201425        |
| bin200    | 95          | 42686              | 18884                   | 97.09            | 0.34              | 38              | 0.000367989        |

|        |     |        |       |       |      |     |             |
|--------|-----|--------|-------|-------|------|-----|-------------|
| bin383 | 268 | 4338   | 3848  | 71.02 | 0.4  | 26  | 0.001038116 |
| bin431 | 223 | 12765  | 8605  | 95.3  | 0.45 | 58  | 0.000863805 |
| bin469 | 124 | 15063  | 10105 | 75.07 | 0.51 | 118 | 0.000480322 |
| bin438 | 308 | 8382   | 6003  | 94.3  | 0.56 | 38  | 0.001193059 |
| bin6   | 329 | 4759   | 4144  | 83.5  | 0.58 | 24  | 0.001274403 |
| bin638 | 292 | 13836  | 8393  | 95.86 | 0.62 | 19  | 0.001131081 |
| bin56  | 90  | 36174  | 22676 | 97.32 | 0.67 | 54  | 0.000348621 |
| bin394 | 95  | 27349  | 15780 | 76.44 | 0.67 | 70  | 0.000367989 |
| bin152 | 225 | 12626  | 9040  | 90.25 | 0.69 | 50  | 0.000871553 |
| bin600 | 25  | 108850 | 83463 | 91.61 | 0.72 | 390 | 9.68392E-05 |
| bin257 | 30  | 150574 | 67116 | 80.38 | 0.75 | 72  | 0.000116207 |
| bin5   | 338 | 9161   | 6310  | 95.97 | 0.81 | 43  | 0.001309266 |
| bin692 | 31  | 121699 | 56853 | 79.35 | 0.92 | 114 | 0.000120081 |
| bin711 | 312 | 6081   | 4838  | 84.33 | 0.94 | 44  | 0.001208553 |
| bin23  | 73  | 44694  | 24280 | 95.39 | 1.01 | 69  | 0.00028277  |
| bin660 | 142 | 21997  | 12675 | 89.26 | 1.01 | 55  | 0.000550046 |
| bin145 | 132 | 23791  | 13143 | 94.92 | 1.08 | 30  | 0.000511311 |
| bin472 | 209 | 16859  | 10971 | 72.09 | 1.08 | 97  | 0.000809575 |
| bin589 | 194 | 18139  | 11090 | 94.8  | 1.34 | 55  | 0.000751472 |
| bin273 | 54  | 45885  | 20729 | 80.85 | 1.4  | 46  | 0.000209173 |
| bin654 | 252 | 15850  | 10149 | 95.5  | 1.45 | 31  | 0.000976139 |
| bin30  | 374 | 3014   | 2877  | 60.28 | 1.46 | 20  | 0.001448714 |
| bin693 | 726 | 6985   | 5024  | 94.72 | 1.54 | 36  | 0.002812209 |
| bin474 | 129 | 33283  | 15394 | 95.57 | 1.58 | 45  | 0.00049969  |
| bin644 | 175 | 21731  | 12692 | 88.11 | 1.6  | 43  | 0.000677874 |
| bin497 | 355 | 5843   | 4709  | 90.88 | 1.61 | 31  | 0.001375116 |
| bin332 | 74  | 60012  | 27326 | 97.89 | 1.64 | 108 | 0.000286644 |
| bin446 | 116 | 36484  | 23295 | 96.98 | 1.67 | 27  | 0.000449334 |
| bin378 | 605 | 4309   | 3795  | 80.13 | 1.69 | 61  | 0.002343508 |
| bin52  | 261 | 22973  | 14965 | 98.58 | 1.77 | 46  | 0.001011001 |
| bin18  | 64  | 88264  | 33098 | 95.85 | 1.89 | 32  | 0.000247908 |
| bin515 | 422 | 3370   | 3113  | 67.79 | 1.89 | 45  | 0.001634645 |
| bin11  | 184 | 15064  | 10943 | 84.79 | 1.92 | 55  | 0.000712736 |
| bin310 | 171 | 8088   | 6415  | 64.24 | 1.95 | 263 | 0.00066238  |
| bin485 | 281 | 14925  | 9336  | 95.97 | 1.96 | 56  | 0.001088472 |
| bin361 | 87  | 81682  | 38466 | 98.66 | 2.01 | 96  | 0.000337    |
| bin734 | 282 | 8412   | 6411  | 92.37 | 2.01 | 24  | 0.001092346 |
| bin53  | 361 | 8648   | 6659  | 91.38 | 2.01 | 37  | 0.001398358 |
| bin284 | 431 | 4266   | 3512  | 61.13 | 2.05 | 31  | 0.001669507 |
| bin724 | 418 | 4719   | 4156  | 88.04 | 2.13 | 29  | 0.001619151 |
| bin553 | 102 | 22618  | 12642 | 70.74 | 2.13 | 276 | 0.000395104 |
| bin403 | 394 | 4421   | 3774  | 70.68 | 2.2  | 94  | 0.001526185 |
| bin162 | 58  | 128189 | 50018 | 98.31 | 2.22 | 265 | 0.000224667 |
| bin389 | 74  | 23454  | 14006 | 89.33 | 2.25 | 209 | 0.000286644 |

|        |     |        |       |       |      |     |             |
|--------|-----|--------|-------|-------|------|-----|-------------|
| bin46  | 217 | 8592   | 6176  | 85.86 | 2.25 | 56  | 0.000840564 |
| bin454 | 110 | 12322  | 8243  | 68.73 | 2.25 | 46  | 0.000426092 |
| bin717 | 80  | 103091 | 43318 | 99.26 | 2.31 | 29  | 0.000309885 |
| bin511 | 170 | 15155  | 8146  | 88.24 | 2.31 | 44  | 0.000658506 |
| bin313 | 147 | 18324  | 9418  | 73.25 | 2.32 | 62  | 0.000569414 |
| bin304 | 362 | 3958   | 3544  | 67.82 | 2.32 | 26  | 0.001402231 |
| bin395 | 142 | 30816  | 18014 | 96.06 | 2.35 | 37  | 0.000550046 |
| bin202 | 350 | 5173   | 4154  | 77.96 | 2.38 | 37  | 0.001355748 |
| bin85  | 406 | 6515   | 5018  | 91.37 | 2.48 | 43  | 0.001572668 |
| bin442 | 190 | 19663  | 10943 | 90.96 | 2.49 | 71  | 0.000735978 |
| bin533 | 155 | 39478  | 22114 | 96.04 | 2.68 | 61  | 0.000600403 |
| bin151 | 280 | 13131  | 8699  | 94.5  | 2.68 | 43  | 0.001084599 |
| bin28  | 258 | 4624   | 4054  | 73.65 | 2.69 | 15  | 0.00099938  |
| bin614 | 375 | 2631   | 2649  | 64.3  | 2.8  | 28  | 0.001452588 |
| bin211 | 372 | 4685   | 3990  | 81.68 | 2.84 | 81  | 0.001440967 |
| bin13  | 39  | 80971  | 56119 | 95.04 | 2.86 | 52  | 0.000151069 |
| bin168 | 549 | 8919   | 6158  | 94.65 | 2.97 | 32  | 0.002126588 |
| bin221 | 677 | 7862   | 5629  | 94.97 | 3.02 | 14  | 0.002622405 |
| bin131 | 96  | 45440  | 25025 | 96.67 | 3.15 | 96  | 0.000371862 |
| bin579 | 98  | 39077  | 19702 | 70.07 | 3.23 | 134 | 0.00037961  |
| bin144 | 507 | 5288   | 4272  | 84.89 | 3.25 | 25  | 0.001963898 |
| bin216 | 166 | 22264  | 13129 | 91.82 | 3.49 | 68  | 0.000643012 |
| bin490 | 427 | 4801   | 4089  | 84.01 | 3.52 | 45  | 0.001654013 |
| bin214 | 287 | 6681   | 5393  | 77.23 | 3.52 | 214 | 0.001111714 |
| bin73  | 504 | 10462  | 7038  | 90.72 | 3.54 | 24  | 0.001952278 |
| bin702 | 76  | 17417  | 12588 | 71.35 | 3.56 | 320 | 0.000294391 |
| bin491 | 222 | 20152  | 13237 | 93.06 | 3.58 | 88  | 0.000859932 |
| bin687 | 306 | 14569  | 9998  | 92.86 | 3.76 | 26  | 0.001185311 |
| bin205 | 461 | 4909   | 4206  | 86.76 | 3.79 | 17  | 0.001785714 |
| bin730 | 540 | 4234   | 3645  | 80.71 | 3.84 | 75  | 0.002091726 |
| bin645 | 295 | 12374  | 8123  | 95.72 | 3.9  | 97  | 0.001142702 |
| bin323 | 365 | 6044   | 4987  | 83.33 | 3.92 | 20  | 0.001413852 |
| bin358 | 150 | 13513  | 8223  | 92.7  | 3.93 | 92  | 0.000581035 |
| bin551 | 100 | 22466  | 12500 | 89.89 | 3.93 | 44  | 0.000387357 |
| bin188 | 258 | 6711   | 5005  | 86.6  | 3.93 | 56  | 0.00099938  |
| bin316 | 315 | 11330  | 7320  | 95.22 | 4.03 | 21  | 0.001220174 |
| bin300 | 403 | 6512   | 5175  | 89.75 | 4.26 | 24  | 0.001561047 |
| bin527 | 71  | 55445  | 22225 | 78.68 | 4.3  | 68  | 0.000275023 |
| bin147 | 223 | 12461  | 7855  | 93.86 | 4.31 | 40  | 0.000863805 |
| bin175 | 141 | 25115  | 14560 | 94.63 | 4.36 | 84  | 0.000546173 |
| bin568 | 166 | 11173  | 7611  | 76.63 | 4.38 | 99  | 0.000643012 |
| bin548 | 210 | 18372  | 12594 | 93.82 | 4.47 | 52  | 0.000813449 |
| bin7   | 268 | 13137  | 8303  | 97.93 | 4.63 | 39  | 0.001038116 |
| bin329 | 250 | 15837  | 9002  | 93.58 | 4.66 | 105 | 0.000968392 |

|   |        |     |       |       |       |      |     |             |
|---|--------|-----|-------|-------|-------|------|-----|-------------|
|   | bin566 | 311 | 3128  | 2883  | 61.1  | 4.73 | 111 | 0.001204679 |
|   | bin623 | 449 | 4402  | 3842  | 77.98 | 4.81 | 25  | 0.001739231 |
|   | bin220 | 313 | 8170  | 6564  | 92.35 | 4.98 | 41  | 0.001212426 |
|   | bin126 | 317 | 2760  | 2657  | 50.85 | 2.07 | 24  | 0.00103002  |
| W | bin8   | 58  | 27680 | 17093 | 52.64 | 2.45 | 127 | 0.000188458 |
|   | bin314 | 57  | 70651 | 16175 | 58.24 | 2.25 | 72  | 0.000185209 |
|   | bin414 | 124 | 14466 | 8773  | 58.32 | 1.68 | 119 | 0.00040291  |
|   | bin270 | 462 | 3593  | 3273  | 59.48 | 1.72 | 98  | 0.001501165 |
|   | bin348 | 98  | 38187 | 22150 | 97.09 | 0    | 62  | 0.000318429 |
|   | bin539 | 102 | 32505 | 19309 | 94.65 | 0    | 44  | 0.000331426 |
|   | bin280 | 177 | 13058 | 8570  | 81.9  | 0    | 42  | 0.000575122 |
|   | bin467 | 71  | 13341 | 10355 | 63.33 | 0    | 119 | 0.000230698 |
|   | bin386 | 341 | 6521  | 5342  | 82.67 | 0.06 | 26  | 0.001108003 |
|   | bin524 | 80  | 34088 | 22195 | 84.17 | 0.48 | 51  | 0.000259942 |
|   | bin252 | 251 | 15769 | 8295  | 77.48 | 0.66 | 24  | 0.000815568 |
|   | bin239 | 278 | 13664 | 8219  | 93.04 | 0.67 | 20  | 0.000903298 |
|   | bin271 | 96  | 30273 | 17016 | 90.46 | 0.79 | 72  | 0.00031193  |
|   | bin119 | 183 | 12913 | 8151  | 94.72 | 0.81 | 45  | 0.000594617 |
|   | bin213 | 115 | 72691 | 24360 | 97.34 | 0.9  | 58  | 0.000373667 |
|   | bin337 | 340 | 3437  | 3190  | 65.8  | 1.01 | 32  | 0.001104753 |
|   | bin202 | 107 | 13088 | 9147  | 82.5  | 1.12 | 63  | 0.000347672 |
|   | bin241 | 57  | 13035 | 9984  | 70.22 | 1.12 | 292 | 0.000185209 |
|   | bin569 | 122 | 10198 | 7668  | 62.84 | 1.28 | 216 | 0.000396412 |
|   | bin62  | 582 | 2758  | 2678  | 63.07 | 1.29 | 12  | 0.001891078 |
|   | bin257 | 339 | 4323  | 3822  | 77.25 | 1.34 | 14  | 0.001101504 |
|   | bin248 | 387 | 3666  | 3442  | 69.16 | 1.34 | 28  | 0.001257469 |
|   | bin373 | 122 | 17863 | 11090 | 62.65 | 1.68 | 297 | 0.000396412 |
|   | bin509 | 53  | 40878 | 22875 | 92.42 | 1.69 | 39  | 0.000172212 |
|   | bin50  | 449 | 3228  | 2992  | 62.93 | 1.72 | 25  | 0.001458924 |
|   | bin580 | 264 | 6646  | 4939  | 77.87 | 1.8  | 112 | 0.000857808 |
|   | bin455 | 127 | 21860 | 10680 | 68.64 | 2.01 | 72  | 0.000412658 |
|   | bin120 | 52  | 40550 | 23225 | 72.75 | 2.08 | 72  | 0.000168962 |
|   | bin559 | 515 | 3564  | 3280  | 64.85 | 2.09 | 25  | 0.001673376 |
|   | bin198 | 230 | 7595  | 5854  | 85.77 | 2.24 | 23  | 0.000747333 |
|   | bin38  | 311 | 4656  | 4209  | 71.47 | 2.35 | 35  | 0.001010524 |
|   | bin197 | 524 | 4385  | 3837  | 78.43 | 2.42 | 61  | 0.00170262  |
|   | bin351 | 259 | 11797 | 8029  | 92.84 | 2.49 | 16  | 0.000841562 |
|   | bin110 | 182 | 48727 | 26338 | 98.28 | 2.51 | 26  | 0.000591368 |
|   | bin80  | 333 | 11850 | 7302  | 94.38 | 2.6  | 27  | 0.001082008 |
|   | bin3   | 60  | 56929 | 29769 | 98.67 | 2.67 | 33  | 0.000194956 |
|   | bin132 | 174 | 7190  | 5244  | 82.21 | 2.81 | 52  | 0.000565374 |
|   | bin183 | 229 | 27826 | 12575 | 89.52 | 2.9  | 117 | 0.000744084 |
|   | bin106 | 429 | 5674  | 4344  | 86.87 | 3.12 | 36  | 0.001393939 |
|   | bin282 | 126 | 51091 | 18995 | 100   | 3.15 | 111 | 0.000409409 |

|        |     |       |       |       |      |     |             |
|--------|-----|-------|-------|-------|------|-----|-------------|
| bin577 | 586 | 3786  | 3479  | 78.53 | 3.31 | 30  | 0.001904075 |
| bin44  | 459 | 4827  | 4146  | 79.42 | 3.35 | 33  | 0.001491417 |
| bin39  | 114 | 47404 | 18747 | 96.42 | 3.36 | 170 | 0.000370417 |
| bin141 | 246 | 10310 | 6865  | 93.79 | 3.38 | 46  | 0.000799322 |
| bin61  | 361 | 5583  | 4672  | 76.37 | 3.47 | 49  | 0.001172988 |
| bin533 | 139 | 14691 | 8550  | 68.89 | 3.58 | 98  | 0.000451649 |
| bin188 | 134 | 13857 | 8413  | 68.5  | 3.84 | 74  | 0.000435403 |
| bin193 | 153 | 12506 | 8003  | 80.9  | 3.93 | 58  | 0.000497139 |
| bin176 | 251 | 16865 | 8361  | 95.97 | 4.26 | 94  | 0.000815568 |
| bin553 | 519 | 5091  | 4289  | 88.55 | 4.47 | 31  | 0.001686374 |
| bin171 | 407 | 4120  | 3665  | 64.05 | 4.63 | 33  | 0.001322455 |
| bin143 | 467 | 3011  | 2845  | 72.86 | 4.64 | 32  | 0.001517411 |
| bin375 | 175 | 8262  | 6450  | 61.88 | 5    | 349 | 0.000568623 |

**Table S3** Rotating component matrix in factor analysis (KMO and Bartlett tests,  $P=0.000002$ )

|                                    | ARGs or VFs                  | F <sub>1</sub> | F <sub>2</sub> | F <sub>3</sub> | F <sub>4</sub> | F <sub>5</sub> | F <sub>6</sub> |
|------------------------------------|------------------------------|----------------|----------------|----------------|----------------|----------------|----------------|
| Antibiotic resistance genes (ARGs) | Adherence                    | -0.138         | 0.052          | -0.171         | 0.065          | -0.854         | 0.086          |
|                                    | Exoenzyme                    | -0.03          | -0.306         | -0.554         | 0.531          | 0.229          | 0.063          |
|                                    | Immune modulation            | 0.56           | -0.175         | -0.365         | 0.061          | -0.56          | 0.09           |
|                                    | Nutritional/Metabolic factor | 0.957          | 0.017          | 0.128          | -0.102         | 0.074          | 0.057          |
|                                    | Regulation                   | 0.90           | -0.046         | 0.216          | -0.214         | 0.148          | 0.071          |
|                                    | Stress survival              | 0.879          | 0.291          | -0.188         | -0.021         | -0.127         | -0.078         |
|                                    | Biofilm                      | 0.231          | -0.178         | 0.651          | -0.178         | 0.447          | 0.252          |
|                                    | Effector delivery system     | 0.31           | 0.694          | 0.278          | 0.019          | 0.075          | 0.127          |
|                                    | Exotoxin                     | 0.159          | 0.038          | 0.745          | 0.049          | 0.246          | -0.063         |
|                                    | Motility                     | -0.226         | 0.691          | 0.056          | 0.085          | -0.217         | 0.086          |
|                                    | Others                       | 0.805          | 0.088          | 0.355          | 0.128          | 0.162          | 0.078          |
| Virulence genes (VFs)              | Multidrug                    | -0.194         | -0.511         | 0.02           | 0.74           | -0.041         | 0.064          |
|                                    | Glycopeptide antibiotic      | 0.263          | 0.761          | -0.412         | -0.191         | 0.18           | -0.025         |
|                                    | Lincosamide antibiotic       | -0.007         | -0.303         | 0.017          | -0.754         | 0.159          | 0.153          |
|                                    | Aminoglycoside antibiotic    | -0.072         | -0.124         | 0              | 0.063          | 0.086          | -0.942         |
| Variance Contributions (%)         |                              | 25.457         | 14.4085        | 12.828         | 10.413         | 10.296         | 6.678          |

Note: The F<sub>1</sub>, F<sub>2</sub>, F<sub>3</sub>, F<sub>4</sub>, F<sub>5</sub> and F<sub>6</sub> are the factor loading of factor 1, factor 2, factor 3, factor 4, factor 5 and factor 6.  
 $P=0.000002$  indicates that the factor analysis can be used to analyse the contribution of KEGG pathways in antimicrobial drug resistance and bacterial infectious disease to HR of golden snub-nosed monkeys.
